# Supplementary material for: Transcriptome Characterization of Repressed Embryonic Myogenesis Due to Maternal Calorie Restriction
Source: Front Cell Dev Biol. 2020 Jun 26;8:527. doi: 10.3389/fcell.2020.00527 (PMC7332729; doi:10.3389/fcell.2020.00527)
Supplement: FILE S5 — Details of the DE miRNAs identified between NE and RE group at different stages. [file Data_Sheet_5.XLS]

## Sheet: NE55 vs NE35
miRNA	NE55	NE35	logFC	Pvalue
NC_010444.3_10332	1	10.5074	-3.39334	0.00312985
NC_010446.4_12775	43	184.607	-2.10205	4.88164e-23
NC_010447.4_13656	304	2709.01	-3.15562	0
NC_010447.4_14166	141	3487.86	-4.62858	0
NC_010447.4_14168	1	1426	-10.4778	0
NC_010448.3_14394	6	96.523	-4.00784	8.15319e-23
NC_010448.3_14733	13	7355.96	-9.14426	0
NC_010450.3_18121	14	67.7057	-2.27385	5.22309e-10
NC_010451.3_18448	10	247.957	-4.63202	6.76494e-62
NC_010451.3_18950	3	17.9671	-2.58233	0.000766367
NC_010451.3_19059	10	247.957	-4.63202	6.76494e-62
NC_010451.3_19280	9	65.959	-2.87357	3.03109e-12
NC_010452.3_206	9	79.3171	-3.13964	1.47928e-15
NC_010452.3_53	663	2392.68	-1.85155	7.34509e-236
NC_010455.4_2764	1	16.3204	-4.02861	0.000126314
NC_010455.4_2849	1539	3627	-1.23678	1.62028e-200
NC_010456.4_4150	129	440.417	-1.7715	2.85033e-42
NC_010458.3_6071	2	40.1412	-4.32701	1.52679e-10
NC_010461.4_19789	71	263.425	-1.8915	3.85281e-28
NC_010461.4_19831	15	33.806	-1.17232	0.00618285
NC_010461.4_19874	3	32.3347	-3.43005	1.79136e-07
NC_010461.4_20429	1	26.171	-4.7099	1.70272e-07
NC_010461.4_20433	1	14.3735	-3.84534	0.000461178
NC_010461.4_20440	7	52.0412	-2.89423	5.65465e-10
NC_010461.4_20442	4	19.5175	-2.2867	0.00081724
NC_010461.4_20444	411	1019.94	-1.31128	8.9467e-63
NC_010461.4_20446	31	148.542	-2.26053	2.26518e-20
NC_010461.4_20448	2	20.6779	-3.37002	3.05651e-05
NC_010461.4_20449	5	18.7285	-1.90523	0.00375121
NW_003541078.1_22385	16	42.411	-1.40637	0.000530911
NW_003541078.1_22388	53	160.847	-1.60163	1.56734e-14
ssc-miR-103	10283	26682.5	-1.37563	0
ssc-miR-106a	1333	2735.88	-1.03733	7.72642e-116
ssc-miR-107	910	2029.14	-1.15693	3.45355e-102
ssc-miR-10a-3p	87	406.514	-2.22422	3.84006e-52
ssc-miR-10a-5p	7747	50372.7	-2.70093	0
ssc-miR-10b	69543	200127	-1.52494	0
ssc-miR-122	2	12.5879	-2.65397	0.00383993
ssc-miR-124a	20	139.83	-2.8056	4.01157e-24
ssc-miR-125a	4303	10085.5	-1.22886	0
ssc-miR-1307	49	132.7	-1.43731	1.34933e-10
ssc-miR-130a	1264	2704.39	-1.09731	6.40243e-125
ssc-miR-135	408	2239.74	-2.45669	1.26824460956102e-313
ssc-miR-137	66	132.905	-1.00986	1.12936e-06
ssc-miR-140-3p	3220	38339.9	-3.57372	0
ssc-miR-140-5p	23	202.291	-3.13672	7.39082e-38
ssc-miR-15b	611	1465.01	-1.26167	1.43342e-84
ssc-miR-17-5p	3760	10907.5	-1.53652	0
ssc-miR-181d-5p	450	1003.3	-1.15675	2.39866e-51
ssc-miR-182	146	1523.97	-3.3838	4.34359e-296
ssc-miR-183	174	2199.66	-3.66012	0
ssc-miR-192	25	4891.96	-7.61234	0
ssc-miR-194a	18	866.314	-5.58882	1.63308e-233
ssc-miR-194b-5p	34	4876.86	-7.16427	0
ssc-miR-196a	217	1805.35	-3.05651	9.17311922007609e-319
ssc-miR-196b-5p	2332	6815.15	-1.54718	0
ssc-miR-199a-3p	67711	139027	-1.03791	0
ssc-miR-199a-5p	65198	134842	-1.04837	0
ssc-miR-19a	3875	10639.5	-1.45716	0
ssc-miR-19b	30220	69334.9	-1.19808	0
ssc-miR-202-5p	27	698.338	-4.69289	5.13794e-173
ssc-miR-204	65	174.205	-1.42228	2.66779e-13
ssc-miR-205	3	1495.27	-8.96123	0
ssc-miR-20a	248	719.011	-1.53567	4.29222e-56
ssc-miR-210	203	711.303	-1.80898	3.4915e-69
ssc-miR-214	511	1153.6	-1.17475	2.91485e-60
ssc-miR-218	477	2057.43	-2.10878	5.32919e-240
ssc-miR-218-5p	477	2057.43	-2.10878	5.32919e-240
ssc-miR-218b	734	4764.32	-2.69842	0
ssc-miR-221-3p	114	338.799	-1.5714	3.61921e-28
ssc-miR-221-5p	28	169.96	-2.60169	9.0188e-27
ssc-miR-222	57	292.168	-2.35776	3.0565e-40
ssc-miR-30a-5p	26341	52754.4	-1.00198	0
ssc-miR-30e-5p	69401	153048	-1.14096	0
ssc-miR-31	1	223.45	-7.80381	1.18907e-66
ssc-miR-345-3p	40	81.3852	-1.02477	0.000120236
ssc-miR-34c	45	958.227	-4.41237	2.97986e-228
ssc-miR-363	3513	8604.75	-1.29243	0
ssc-miR-371-5p	1	18.2708	-4.19146	3.42108e-05
ssc-miR-424-5p	10292	21568.9	-1.06743	0
ssc-miR-429	1	544.203	-9.088	1.56762e-164
ssc-miR-4332	14	71.3961	-2.35042	1.09142e-10
ssc-miR-615	19	173.961	-3.19469	1.97816e-33
ssc-miR-708-3p	236	750.568	-1.6692	1.19651e-65
ssc-miR-769-3p	52	104.208	-1.00289	1.85813e-05
ssc-miR-874	178	661.241	-1.8933	2.50273e-68
ssc-miR-9	39	123.784	-1.66628	5.12331e-12
ssc-miR-9-1	98	387.323	-1.98268	4.02501e-43
ssc-miR-9-2	98	387.323	-1.98268	4.02501e-43
ssc-miR-92b-3p	90	466.362	-2.37345	6.14936e-64
ssc-miR-96-5p	130	2250.78	-4.11384	0
ssc-miR-9851-3p	28	69.0149	-1.30148	2.38192e-05
ssc-miR-99b	14504	33267.7	-1.19767	0
NC_010445.3_11338	465	189.21	1.29724	1.33135e-26
NC_010445.3_12005	169	17.1949	3.29697	3.8752e-32
NC_010447.4_13442	16	0.959159	4.06016	0.000277811
NC_010447.4_14304	14	1.94051	2.85092	0.00421149
NC_010448.3_15620	82	5.60284	3.87139	4.99546e-18
NC_010449.4_16480	166	22.296	2.89632	4.74578e-28
NC_010449.4_16645	22	3.04123	2.85478	0.00015947
NC_010449.4_16900	57	16.3279	1.80363	1.66531e-06
NC_010451.3_19102	610	16.7079	5.19021	7.79066e-154
NC_010454.3_1168	591	185.317	1.67316	1.70963e-48
NC_010454.3_1179	443	212.227	1.0617	9.64958e-19
NC_010454.3_1559	123	1.05981	6.8587	2.24253e-35
NC_010454.3_1591	591	185.317	1.67316	1.70963e-48
NC_010456.4_3781	25	4.19065	2.57668	0.00010612
NC_010457.4_4659	45	13.6758	1.7183	6.87036e-05
NC_010457.4_5124	87	5.62285	3.95164	2.26361e-19
NC_010459.4_6518	19	3.0046	2.66076	0.000866804
NC_010461.4_19708	4219	1682.49	1.32631	7.11861e-236
NC_010461.4_19780	37	11.1401	1.73176	0.000230328
NC_010461.4_19782	69	26.555	1.37762	2.35698e-05
NW_003539007.1_21515	1123	462.037	1.28128	9.96613e-61
NW_003539007.1_21521	669	195.251	1.77668	2.28169e-59
NW_003539007.1_21524	7232	2099.24	1.78453	0
NW_003539007.1_21526	163	44.4067	1.87602	6.47877e-17
NW_003539007.1_21528	949	145.717	2.70324	4.09204e-141
NW_003539007.1_21530	2031	832.152	1.28727	3.73595e-109
NW_003539007.1_21532	1582	559.72	1.49897	7.84175e-108
NW_003539007.1_21542	29692	5078.3	2.54766	0
NW_003539007.1_21544	591	185.317	1.67316	1.70963e-48
NW_003539007.1_21546	2254	673.015	1.74378	8.04767e-191
NW_003539007.1_21560	4500	808.484	2.47663	0
NW_003613004.1_20509	443	212.227	1.0617	9.64958e-19
NW_003613275.1_21363	105	48.8699	1.10337	1.12585e-05
ssc-let-7a	15647	6620.38	1.2409	0
ssc-let-7c	9390	4377.98	1.10086	0
ssc-let-7d-3p	337	109.579	1.62078	6.89514e-27
ssc-let-7d-5p	2353	594.905	1.98377	5.83365e-238
ssc-let-7f	27998	11324.2	1.30591	0
ssc-let-7g	70886	29368.1	1.27125	0
ssc-let-7i	775	193.519	2.00172	2.30194e-80
ssc-miR-1	44406	3237.88	3.77763	0
ssc-miR-127	54092	10983.9	2.30002	0
ssc-miR-1277	53	19.9532	1.40937	0.000150063
ssc-miR-133a-3p	2391	382.247	2.64504	0
ssc-miR-133a-5p	4001	711.085	2.49227	0
ssc-miR-133b	151318	26823.3	2.49602	0
ssc-miR-136	16698	3238.97	2.36607	0
ssc-miR-139-3p	83	40.7471	1.02642	0.000293229
ssc-miR-139-5p	185	49.9364	1.88936	7.68074e-19
ssc-miR-1468	415	109.101	1.92744	7.7077e-42
ssc-miR-146b	63	22.615	1.47807	2.04081e-05
ssc-miR-150	45	17.329	1.37674	0.000518315
ssc-miR-155-5p	137	32.413	2.07953	2.46211e-16
ssc-miR-190a	195	86.5169	1.17242	2.62216e-10
ssc-miR-193a-3p	71	30.3874	1.22435	8.54643e-05
ssc-miR-193a-5p	56	21.2342	1.39904	8.76625e-05
ssc-miR-195	113	32.1856	1.81183	1.62547e-11
ssc-miR-206	314624	51530.5	2.61013	0
ssc-miR-208b	2981	664.836	2.16473	0
ssc-miR-216	100	20.6309	2.27712	3.4665e-13
ssc-miR-217	153	61.5026	1.31481	1.13874e-09
ssc-miR-299	433	58.6718	2.88363	6.40802e-70
ssc-miR-338	101	1.0483	6.59017	6.4346e-29
ssc-miR-3613	137	36.2984	1.9162	9.28967e-15
ssc-miR-362	26995	10868.7	1.31252	0
ssc-miR-369	90871	19215.2	2.24157	0
ssc-miR-370	10866	5153.55	1.07618	0
ssc-miR-376a-3p	1326	325.915	2.02451	1.32962e-138
ssc-miR-376a-5p	1462	635.911	1.20105	6.62738e-71
ssc-miR-376c	423	100.673	2.07099	1.42255e-46
ssc-miR-378	15144	2455.93	2.6244	0
ssc-miR-378b-3p	1543	156.412	3.30232	4.87305e-281
ssc-miR-381	546	71.87	2.92544	3.21449e-89
ssc-miR-382	277	46.6922	2.56863	5.57453e-40
ssc-miR-411	696	102.822	2.75895	2.08222e-106
ssc-miR-432-5p	675	123.039	2.45577	9.71725e-91
ssc-miR-450b-3p	45	19.7829	1.18567	0.0027166
ssc-miR-450c-3p	217	89.7315	1.27401	1.09219e-12
ssc-miR-486	2515	448.37	2.4878	0
ssc-miR-487b	49	12.5347	1.96686	5.15552e-06
ssc-miR-489	84	2.1507	5.28751	1.33579e-22
ssc-miR-493-3p	2367	574.088	2.04371	4.65781e-249
ssc-miR-493-5p	3546	440.787	3.00804	0
ssc-miR-499-3p	353	132.455	1.41416	1.9307e-23
ssc-miR-499-5p	10926	1843.48	2.56726	0
ssc-miR-500	1614	766.137	1.07497	2.56311e-65
ssc-miR-542-5p	44	10.064	2.1283	3.59649e-06
ssc-miR-545-5p	21	6.36677	1.72176	0.00599496
ssc-miR-664-3p	46	12.485	1.88143	8.73291e-06
ssc-miR-7138-5p	33	4.25468	2.95534	1.13281e-06
ssc-miR-758	30310	11144.7	1.44343	0
ssc-miR-95	326	150.495	1.11515	2.36275e-15
ssc-miR-98	5089	2198.25	1.21102	1.01159e-245
ssc-miR-9803-5p	782	70.0893	3.4799	5.42204e-150

## Sheet: NE90 VS NE55
miRNA	NE90	NE55	logFC	Pvalue
NC_010447.4_14349	2165	6132.42	-1.50209	0
NC_010449.4_16900	7	43.1279	-2.62319	4.23187e-08
NC_010451.3_18188	86	392.147	-2.18899	8.4965e-52
NC_010451.3_19201	10	53.5395	-2.4206	3.77216e-09
NC_010452.3_53	206	499.095	-1.27667	6.10801e-33
NC_010454.3_1179	73	332.667	-2.18811	3.45164e-44
NC_010458.3_5984	7695	30758.5	-1.99899	0
NC_010461.4_19780	11	27.9929	-1.34756	0.00374748
NW_003613004.1_20509	73	332.667	-2.18811	3.45164e-44
NW_003613327.1_21604	16	33.93	-1.08449	0.00677544
ssc-miR-105-1	1	16.1948	-4.01746	0.00010026
ssc-miR-10a-3p	24	65.2617	-1.4432	3.44469e-06
ssc-miR-124a	1	15.4622	-3.95067	0.000194999
ssc-miR-27b-5p	12	30.9933	-1.36892	0.00207694
ssc-miR-499-3p	129	265.193	-1.03967	9.62593e-14
ssc-miR-9803-5p	277	589.389	-1.08934	8.40117e-31
ssc-miR-145-5p	32847	12911.5	1.3471	0
ssc-miR-182	225	109.639	1.03716	7.25523e-09
ssc-miR-19a	6437	2979.92	1.11112	8.12906e-243
ssc-miR-19b	50661	23751.8	1.09284	0

## Sheet: NE35 vs RE35
miRNA	NE35	RE35	logFC	Pvalue
NC_010443.4_8125	1	10.6094	-3.40727	0.00243361
NC_010445.3_12005	14	42.6217	-1.60616	2.75338e-05
NC_010447.4_13814	19	53.3271	-1.48887	1.43421e-05
NC_010449.4_16900	14	40.3508	-1.52717	0.000107353
NC_010451.3_18188	221	656.403	-1.57053	2.62058e-59
NC_010451.3_19102	13	36.4768	-1.48847	0.000463559
NC_010454.3_1179	151	402.864	-1.41575	1.75138e-32
NC_010455.4_3061	16	37.294	-1.22087	0.00143132
NC_010461.4_19780	10	25.2586	-1.33677	0.00618629
NW_003539007.1_21528	102	219.331	-1.10454	1.89681e-13
NW_003541040.1_22315	1	9.21181	-3.20348	0.00897696
NW_003613004.1_20509	151	402.864	-1.41575	1.75138e-32
ssc-miR-217	48	96.5941	-1.0089	5.60256e-06
ssc-miR-378b-3p	107	223.896	-1.06522	4.31177e-13
ssc-miR-382	36	73.8644	-1.03688	5.06926e-05
ssc-miR-545-5p	6	18.6105	-1.63308	0.00786066
NC_010443.4_9220	4159	1999.92	1.0563	1.68402e-132
NC_010446.4_12775	145	20.0976	2.85096	1.68771e-22
NC_010447.4_13656	1771	126.202	3.81076	0
NC_010447.4_14166	2322	180.929	3.68187	0
NC_010447.4_14168	1198	72.5364	4.04578	9.26735e-243
NC_010448.3_14394	85	1.28499	6.04763	3.97285e-23
NC_010448.3_14733	5230	304.573	4.10195	0
NC_010450.3_18121	58	16.8335	1.78472	8.19097e-06
NC_010452.3_206	69	9.43687	2.87022	1.11015e-11
NC_010458.3_6071	39	1.96529	4.31066	2.97271e-09
NC_010461.4_20429	27	5.08018	2.41001	0.000251502
NC_010461.4_20433	15	1.42559	3.39534	0.000608345
NC_010461.4_20440	47	12.4423	1.9174	1.91288e-05
NC_010461.4_20444	683	253.255	1.4313	9.1542e-39
NC_010461.4_20446	119	44.0124	1.43498	6.50259e-08
NC_010461.4_20448	21	3.91527	2.4232	0.00115095
NW_003613327.1_21604	28	2.62642	3.41426	1.27409e-05
ssc-miR-10a-3p	301	107.152	1.4901	4.83493e-19
ssc-miR-10a-5p	26821	9039.33	1.56908	0
ssc-miR-126-3p	11403	4844.09	1.23512	0
ssc-miR-126-5p	4104	1974.2	1.05576	1.174e-130
ssc-miR-192	3442	29.6761	6.8578	0
ssc-miR-194a	663	8.76508	6.2411	3.22724e-171
ssc-miR-194b-5p	3388	40.4418	6.38844	0
ssc-miR-202-5p	530	1.18154	8.80918	3.43907e-148
ssc-miR-204	135	30.4442	2.14872	2.98382e-15
ssc-miR-20b	1012	475.071	1.09099	1.60653e-35
ssc-miR-22-3p	6055	2955.93	1.03452	1.09518e-184
ssc-miR-221-5p	136	65.5956	1.05194	1.51941e-05
ssc-miR-29a	711	158.569	2.16474	3.78178e-74
ssc-miR-30a-3p	587	242.521	1.27525	1.19852e-27
ssc-miR-30a-5p	26911	4948.27	2.4432	0
ssc-miR-30c-3p	149	55.3824	1.42781	1.48921e-09
ssc-miR-30c-5p	6672	2994.57	1.15577	8.01142e-250
ssc-miR-30d	41701	20590.3	1.01812	0
ssc-miR-31	206	86.7571	1.24759	3.65714e-10
ssc-miR-34a	176	62.1027	1.50285	7.08356e-12
ssc-miR-363	4992	2245.27	1.15273	1.76738e-186
ssc-miR-371-5p	19	0.73907	4.68415	5.1834e-05
ssc-miR-429	481	24.2728	4.30862	1.56883e-103
ssc-miR-4332	61	25.0276	1.28529	0.000490809
ssc-miR-497	25	5.70395	2.1319	0.00174595

## Sheet: NE55 vs RE55
miRNA	NE55	RE55	logFC	Pvalue
NC_010445.3_11338	465	993.698	-1.09558	5.62219e-59
NC_010446.4_12102	1	11.3075	-3.49921	0.0022035
NC_010461.4_19831	15	63.5625	-2.08321	1.00111e-09
ssc-miR-217	153	377.523	-1.30303	3.19171e-29
ssc-miR-218b	734	1468.92	-1.0009	1.56894e-76
ssc-miR-499-3p	353	816.148	-1.20916	1.80286e-55
NC_010446.4_12775	43	14.9124	1.52782	0.00138055
NC_010448.3_15620	82	36.3608	1.17324	0.000293559
NC_010449.4_16480	166	67.7272	1.29338	2.68251e-08
NC_010449.4_16900	57	26.2543	1.11841	0.00409575
NC_010451.3_19102	610	215.853	1.49876	6.92287e-35
NC_010454.3_1347	521	234.709	1.15041	4.23483e-19
NC_010454.3_1559	123	37.6361	1.70847	1.00226e-09
NC_010457.4_5124	87	31.3397	1.47302	4.66134e-06
NW_003613327.1_21604	45	4.90926	3.19635	3.17704e-08
ssc-miR-145-5p	16522	7782.33	1.08611	0
ssc-miR-196b-5p	2332	993.637	1.23078	6.04044e-91
ssc-miR-202-5p	27	1.17236	4.52547	8.24787e-07
ssc-miR-29a	790	366.261	1.10898	2.04011e-26
ssc-miR-338	101	32.606	1.63115	1.28492e-07
ssc-miR-34a	168	72.7414	1.20761	1.34126e-07
ssc-miR-3613	137	65.2265	1.07065	2.07118e-05
ssc-miR-378b-3p	1543	665.275	1.21372	2.65067e-59
ssc-miR-489	84	30.0786	1.48165	7.77561e-06
ssc-miR-497	52	17.442	1.57595	0.000154727
ssc-miR-96-5p	130	58.9601	1.1407	1.06925e-05

## Sheet: NE90 vs RE90
miRNA	NE90	RE90	logFC	Pvalue
NC_010451.3_18188	86	179.588	-1.06228	1.21242e-08
NC_010451.3_18448	8	48.5424	-2.60117	2.75679e-08
NC_010451.3_19059	8	48.5424	-2.60117	2.75679e-08
NC_010451.3_19201	10	28.4021	-1.506	0.00511216
NC_010461.4_19789	45	204.605	-2.18484	1.73204e-25
ssc-miR-10a-3p	24	90.5865	-1.91626	2.34758e-10
ssc-miR-10a-5p	5238	12974.6	-1.30861	0
ssc-miR-124a	1	454.507	-8.82816	1.67466e-134
ssc-miR-1296-5p	30	62.7584	-1.06485	0.000817958
ssc-miR-135	187	420.256	-1.16823	3.35754e-21
ssc-miR-137	45	91.3475	-1.02144	0.00010093
ssc-miR-140-3p	1961	5500.19	-1.48789	0
ssc-miR-140-5p	16	55.7617	-1.8012	2.43114e-06
ssc-miR-182	225	589.653	-1.38994	6.85243e-38
ssc-miR-183	139	1890.65	-3.76573	0
ssc-miR-196a	196	742.844	-1.92221	1.12564e-74
ssc-miR-222	48	99.1642	-1.04679	3.21432e-05
ssc-miR-31	1	13.3794	-3.74194	0.00183322
ssc-miR-615	6	26.1213	-2.12219	0.000536902
ssc-miR-9	19	363.387	-4.25743	5.4046e-83
ssc-miR-9-1	58	1138.02	-4.29433	4.92828e-259
ssc-miR-9-2	58	1138.02	-4.29433	4.92828e-259
ssc-miR-96-5p	171	1824.14	-3.41515	0
NC_010454.3_1347	264	123.566	1.09525	4.5572e-13
ssc-miR-19a	6437	2709.17	1.24854	0
ssc-miR-19b	50661	23715	1.09507	0
ssc-miR-217	141	59.0878	1.25476	4.05684e-09
